# Supplementary material for: Prior COVID-19 Infection and Antibody Response to Single Versus Double Dose mRNA SARS-CoV-2 Vaccination
Source: bioRxiv or medRxiv preprint supplement (doi:10.1101/2021.02.23.21252230), 2021-02-26

## SUPPLEMENTAL MATERIAL

**Table S1. Comparison of antibody levels between participants with and without prior COVID-19 infection at matched time points.** Values are shown as median and interquartile range [IQR], with comparisons performed using Wilcoxon tests. Sample sizes at baseline, After Dose 1, and After Dose 2 included: N=902, N=490, and N=227 for persons without prior COVID-19; and N=78, N=35, and N=11 for persons with prior COVID-19.

|                   | No Prior COVID-19 | Prior COVID-19    | P value |
|-------------------|-------------------|-------------------|---------|
| <b>Log IgG(S)</b> |                   |                   |         |
| Baseline          | 0.6 [0.2, 1.2]    | 6.0 [4.6, 6.9]    | <0.001  |
| After Dose 1      | 7.0 [6.3, 7.6]    | 10.0 [9.2, 10.4]  | <0.001  |
| After Dose 2      | 9.9 [9.4, 10.3]   | 10.6 [10.3, 10.7] | <0.001  |
| <b>Log IgG(N)</b> |                   |                   |         |
| Baseline          | -3.9 [-4.6, -3.2] | 0.6 [-0.5, 1.2]   | <0.001  |
| After Dose 1      | -2.8 [-3.9, -1.7] | 0.6 [-0.1, 1.2]   | <0.001  |
| After Dose 2      | -2.7 [-3.7, -1.3] | 1.0 [0.2, 1.1]    | <0.001  |
| <b>Log IgM(S)</b> |                   |                   |         |
| Baseline          | -3.2 [-3.5, -2.7] | -0.3 [-1.4, 0.8]  | <0.001  |
| After Dose 1      | 0.1 [-0.8, 0.8]   | 0.1 [-0.4, 1.0]   | 0.43    |
| After Dose 2      | 0.7 [-0.1, 1.3]   | -0.1 [-0.6, 1.4]  | 0.59    |

**Table S2. Comparison of antibody levels between participants with and without prior COVID-19 infection at shifted time points.** Values are shown as median and interquartile range [IQR], with comparisons performed using Wilcoxon tests. Sample sizes at baseline, After Dose 1, and After Dose 2 included: N=902, N=490, and N=227 for persons without prior COVID-19; and N=78, N=35, and N=11 for persons with prior COVID-19.

|                                                                    | No Prior COVID-19 | Prior COVID-19   | P value |
|--------------------------------------------------------------------|-------------------|------------------|---------|
| <b>No Prior COVID-19 After Dose 1, Prior COVID-19 at Baseline</b>  |                   |                  |         |
| Log IgG(S)                                                         | 7.0 [6.3, 7.6]    | 6.0 [4.6, 6.9]   | <0.001  |
| Log IgG(N)                                                         | -2.8 [-3.9, -1.7] | 0.6 [-0.5, 1.2]  | <0.001  |
| Log IgM(S)                                                         | 0.1 [-0.8, 0.8]   | -0.3 [-1.4, 0.8] | 0.09    |
| <b>No Prior COVID-19 After Dose 2, Prior COVID-19 After Dose 1</b> |                   |                  |         |
| Log IgG(S)                                                         | 9.9 [9.4, 10.3]   | 10.0 [9.2, 10.4] | 0.91    |
| Log IgG(N)                                                         | -2.7 [-3.7, -1.3] | 0.6 [-0.1, 1.2]  | <0.001  |
| Log IgM(S)                                                         | 0.7 [-0.1, 1.3]   | 0.1 [-0.4, 1.0]  | 0.052   |

**Table S3. Sensitivity analysis comparing antibody levels between participants with and without prior COVID-19 infection at matched time points.** Values are shown as median and interquartile range [IQR], with comparisons performed using Wilcoxon tests. The sample with data available at all time points included N=206 without prior COVID-19 and N=10 with prior COVID-19.

|                   | No Prior COVID-19 | Prior COVID-19    | P value |
|-------------------|-------------------|-------------------|---------|
| <b>Log IgG(S)</b> |                   |                   |         |
| Baseline          | 0.7 [0.2, 1.2]    | 5.9 [2.7, 7.2]    | <0.001  |
| After Dose 1      | 7.0 [6.2, 7.6]    | 10.2 [8.4, 10.5]  | <0.001  |
| After Dose 2      | 9.9 [9.4, 10.3]   | 10.6 [10.3, 10.8] | 0.001   |
| <b>Log IgG(N)</b> |                   |                   |         |
| Baseline          | -3.9 [-4.6, -3.0] | 0.7 [0.1, 1.0]    | <0.001  |
| After Dose 1      | -2.7 [-3.9, -1.6] | 0.8 [-0.1, 1.2]   | <0.001  |
| After Dose 2      | -2.7 [-3.9, -1.3] | 0.9 [0.0, 1.1]    | <0.001  |
| <b>Log IgM(S)</b> |                   |                   |         |
| Baseline          | -3.2 [-3.5, -2.7] | -1.2 [-1.9, 0.5]  | <0.001  |
| After Dose 1      | 0.0 [-0.7, 0.7]   | 0.1 [-0.2, 1.0]   | 0.51    |
| After Dose 2      | 0.7 [-0.1, 1.3]   | -0.2 [-0.7, 1.1]  | 0.24    |

**Table S4. Sensitivity analysis comparing antibody levels between participants with and without prior COVID-19 infection at shifted time points.** Values are shown as median and interquartile range [IQR], with comparisons performed using Wilcoxon tests. The sample with data available at all time points included N=206 without prior COVID-19 and N=10 with prior COVID-19.

|                                                                    | No Prior COVID-19 | Prior COVID-19   | P value |
|--------------------------------------------------------------------|-------------------|------------------|---------|
| <b>No Prior COVID-19 After Dose 1, Prior COVID-19 at Baseline</b>  |                   |                  |         |
| Log IgG(S)                                                         | 7.0 [6.2, 7.6]    | 5.9 [2.7, 7.2]   | 0.049   |
| Log IgG(N)                                                         | -2.7 [-3.9, -1.6] | 0.7 [0.1, 1.0]   | 0.001   |
| Log IgM(S)                                                         | 0.0 [-0.7, 0.7]   | -1.2 [-1.9, 0.5] | 0.08    |
| <b>No Prior COVID-19 After Dose 2, Prior COVID-19 After Dose 1</b> |                   |                  |         |
| Log IgG(S)                                                         | 9.9 [9.4, 10.3]   | 10.2 [8.4, 10.5] | 0.58    |
| Log IgG(N)                                                         | -2.7 [-3.9, -1.3] | 0.8 [-0.1, 1.2]  | <0.001  |
| Log IgM(S)                                                         | 0.7 [-0.1, 1.3]   | 0.1 [-0.2, 1.0]  | 0.31    |

**Table S5. Comparison of proportions of anti-Spike protein IgG antibody levels  $\geq 4160$  AU/mL between participants with and without prior COVID-19 infection at matched time points.** Sample sizes at baseline, After Dose 1, and After Dose 2 included: N=902, N=490, and N=227 for persons without prior COVID-19; and N=78, N=35, and N=11 for persons with prior COVID-19.

|                         | No Prior COVID-19 | Prior COVID-19 | P value |
|-------------------------|-------------------|----------------|---------|
| IgG S $\geq 4160$ AU/mL | n/N (%)           | n/N (%)        |         |
| Baseline                | 0/902 (0)         | 6/78 (8)       | <0.001  |
| After Dose 1            | 37/490 (8)        | 27/35 (77)     | <0.001  |
| After Dose 2            | 220/227 (97)      | 11/11 (100)    | 1.00    |

**Figure S1. Anti-Nucleocapsid IgG Antibody Response to mRNA SARS-CoV-2 Vaccination in Persons With and Without Prior COVID-19 Infection.**

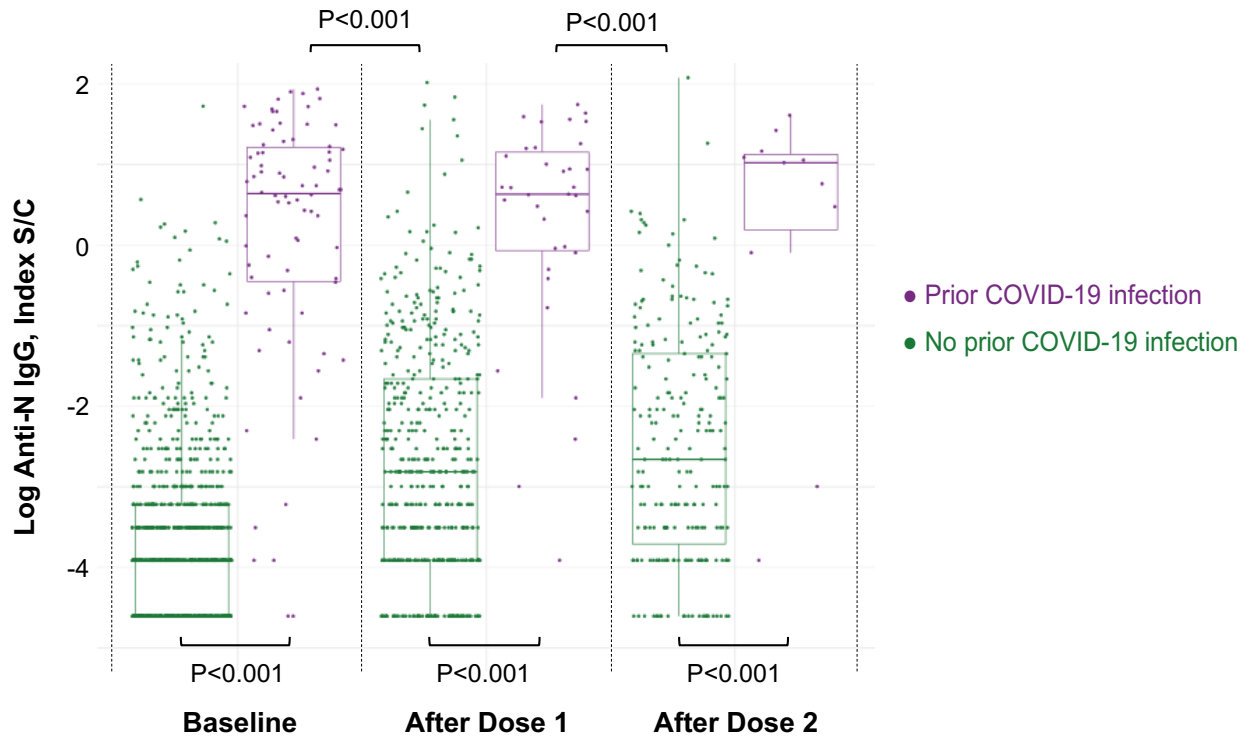

**Figure S2. Anti-Spike IgG Antibody Response to mRNA SARS-CoV-2 Vaccination in Persons With and Without Prior COVID-19 Infection: Values Above and Below Threshold.**

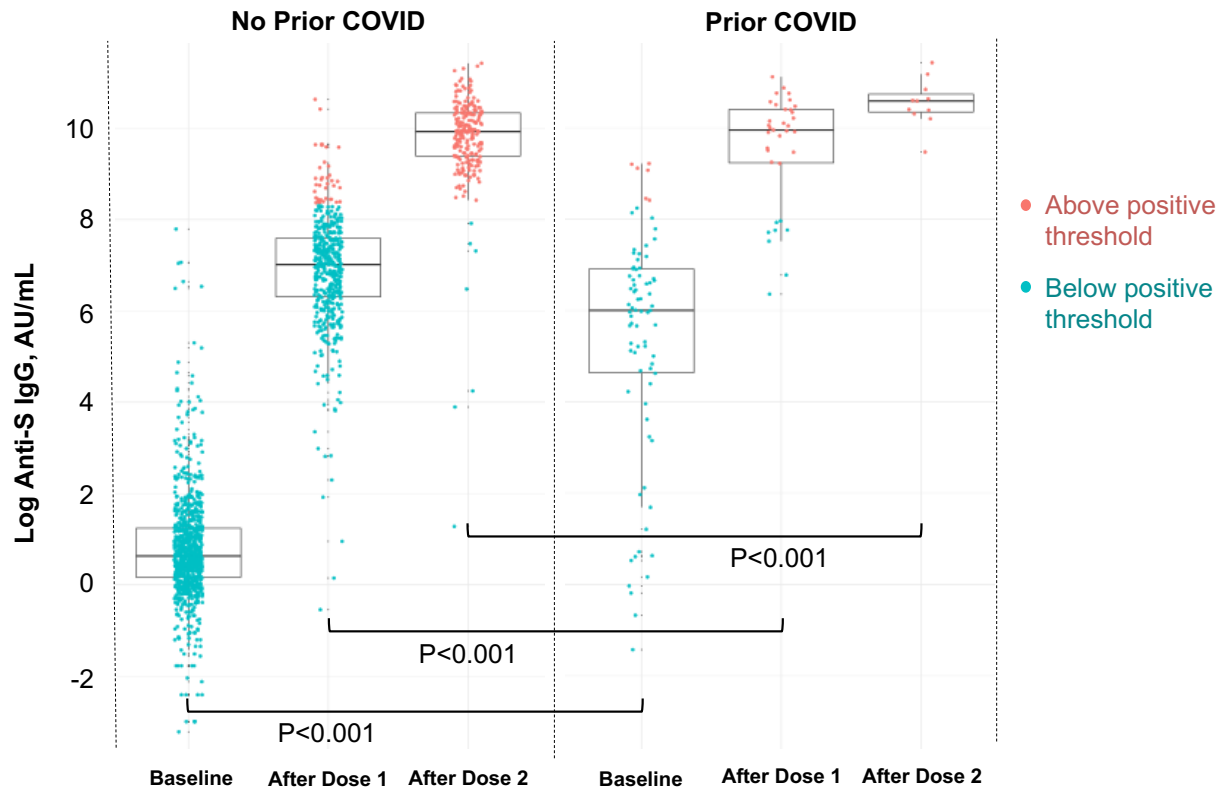

**Figure S3. Post-Vaccination Symptoms in Persons With and Without Prior COVID-19 Infection.**

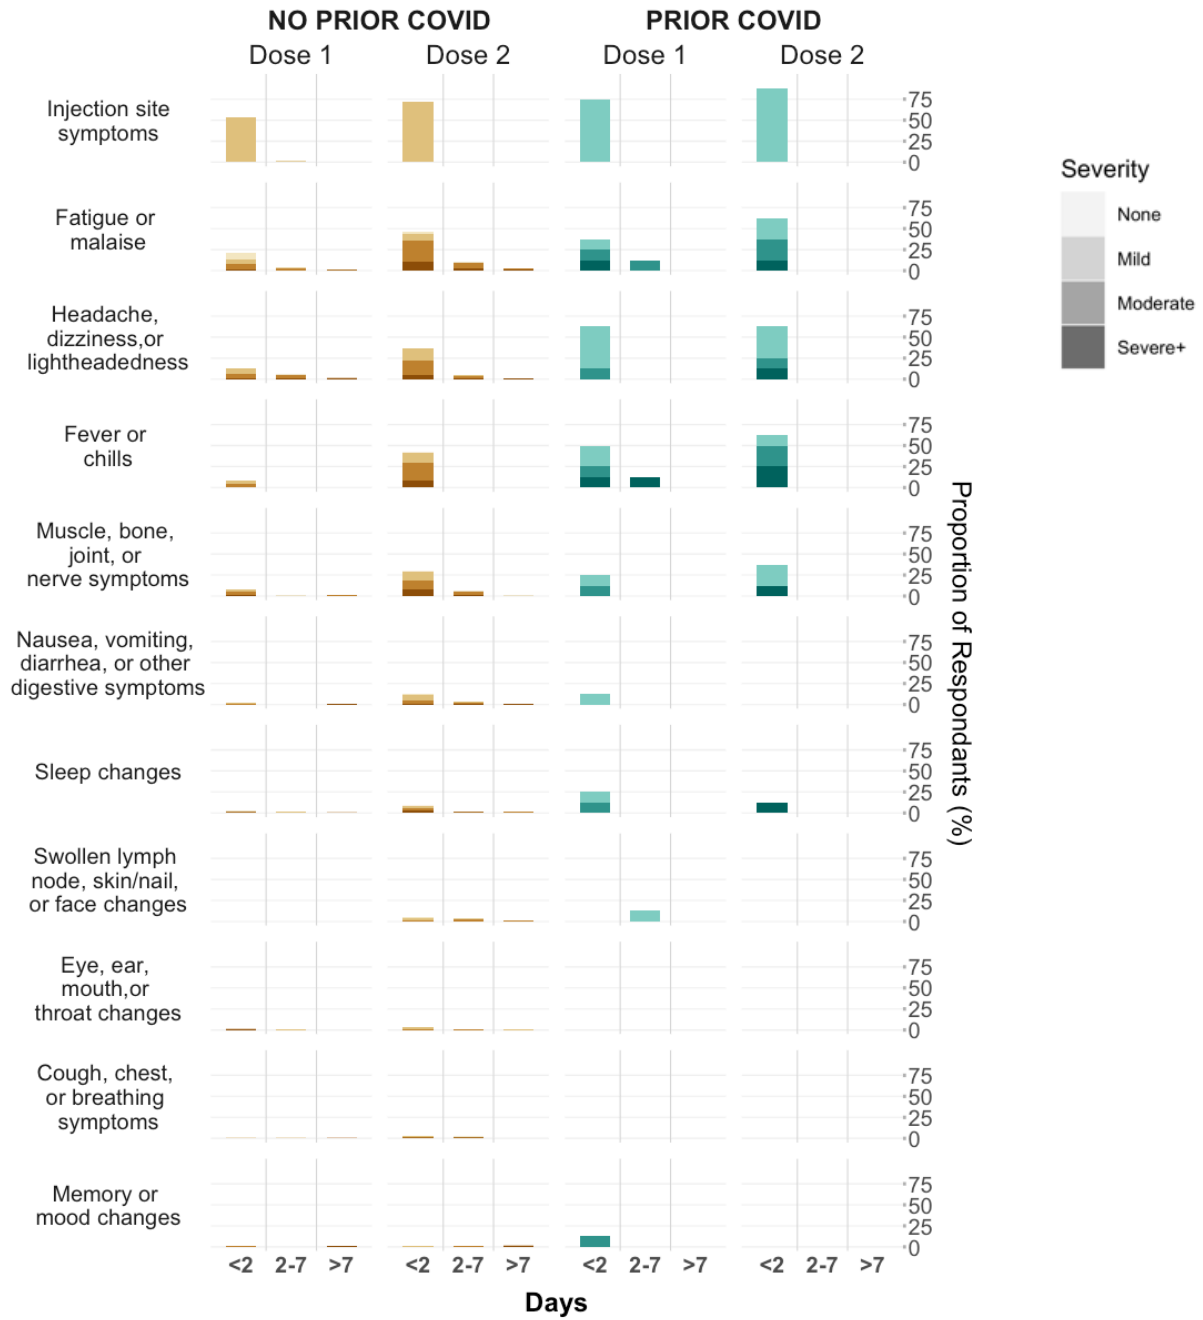

**Figure S4. Anti-Spike IgG Antibody Response to mRNA SARS-CoV-2 Vaccination in Persons With and Without Prior COVID-19 Infection: Values Above and Below 4160 AU/mL.**

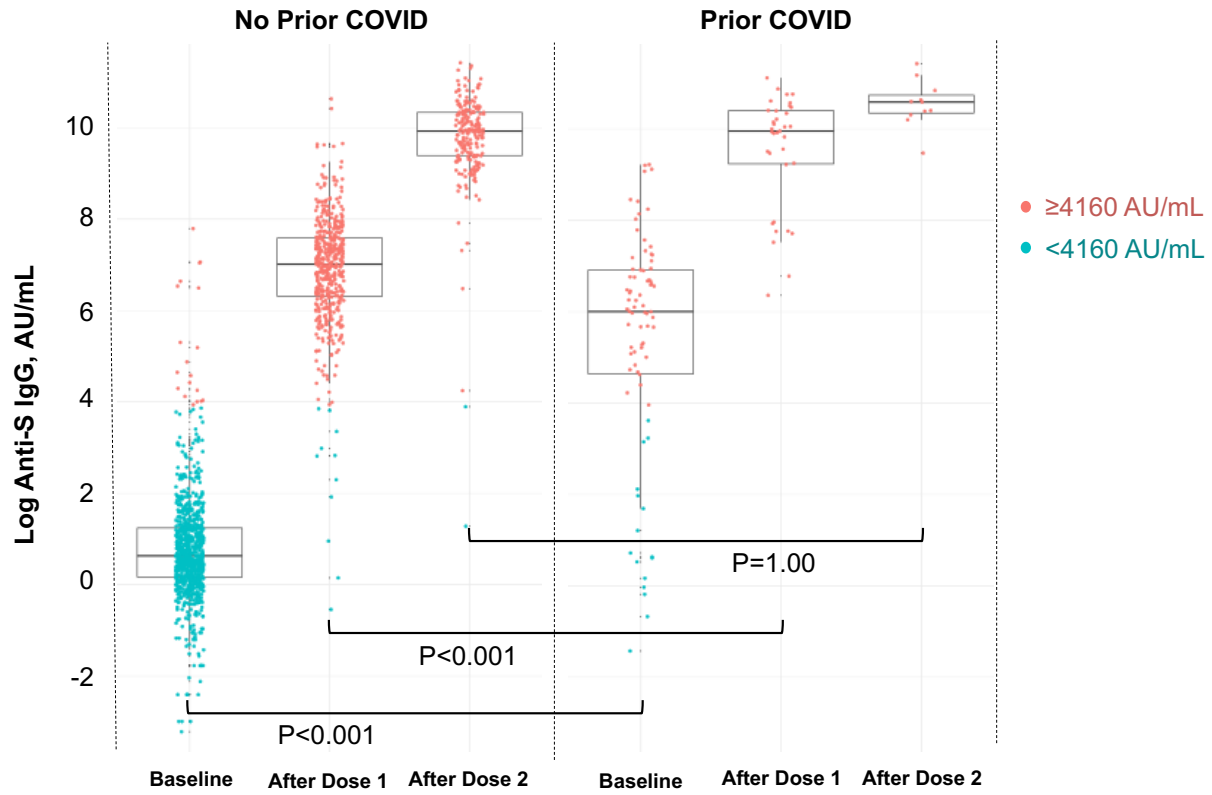

Supplement: Supplementary file [file media-1.pdf]
